# Supplementary material for: Determination of volatile organic compounds (VOCs) in indoor work environments by solid phase microextraction-gas chromatography-mass spectrometry
Source: PubMed Central journal article supplement (PMC11379745; doi:10.1007/s11356-024-34715-7), 2024-08-19
Supplement: 11356_2024_34715_MOESM1_ESM.pdf [file 11356_2024_34715_MOESM1_ESM.pdf]

## **SUPPLEMENTARY INFORMATION**

### **Determination of Volatile Organic Compounds (VOCs) in indoor working environments by Solid Phase Microextraction-Gas Chromatography-Mass Spectrometry**

W.M. V. Marchesiello, G. Spadaccino, M. Usman, D. Nardiello\*, M. Quinto

*Department of Agriculture, Food, Natural resources and Engineering (DAFNE) - University of Foggia, Via Napoli, 25 - 71122 Foggia (Italy)*

- **Table S1.** The total list of the compounds identified by SPME-GC-MS.
- **Table S2.** Correlation matrix obtained for selected compounds identified by SPME-GC-MS (see section 3.2 for details).

---

\* Corresponding author phone: +39 0881 338173; email: donatella.nardiello@unifg.it

**Table S1.** The total list of the compounds identified by SPME-GC-MS.

| No | CAS No     | Compound                                                                | Zone A    |            | Zone B    |            |
|----|------------|-------------------------------------------------------------------------|-----------|------------|-----------|------------|
|    |            |                                                                         | System ON | System OFF | System ON | System OFF |
| 1  | 30689-78-2 | (R)-(-)-(Z)-14-Methyl-8-hexadecen-1-ol                                  |           |            | ✓         |            |
| 2  | 4254-15-3  | (S)-(+)-1,2-Propanediol                                                 | ✓         |            |           |            |
| 3  | 80-56-8    | alpha.-Pinene                                                           |           |            | ✓         |            |
| 4  | 37985-11-8 | 1-(4-Methylphenyl)-4-phenylbuta-1,3-diene                               | ✓         |            |           |            |
| 5  | 643-93-6   | 1,1'-Biphenyl, 3-methyl-                                                | ✓         |            |           |            |
| 6  | 25395-31-7 | 1,2,3-Propanetriol, diacetate                                           | ✓         |            |           |            |
| 7  | 4376-20-9  | 1,2-Benzenedicarboxylic acid, mono(2-ethylhexyl) ester                  | ✓         |            |           | ✓          |
| 8  | 84-79-7    | 1,4-Naphthalenedione, 2-hydroxy-3-(3-methyl-2-butenyl)-                 |           | ✓          |           |            |
| 9  | 777-95-7   | 1,6-Dioxacyclododecane-7,12-dione                                       | ✓         | ✓          | ✓         |            |
| 10 | 35289-31-7 | 11-Dodecenol                                                            | ✓         |            |           |            |
| 11 | 872-05-9   | 1-Decene                                                                | ✓         |            |           |            |
| 12 | 112-41-4   | 1-Dodecene                                                              | ✓         |            |           |            |
| 13 | 822-20-8   | 1-Heptadecanol, acetate                                                 |           |            | ✓         |            |
| 14 | 6765-39-5  | 1-Heptadecene                                                           |           |            | ✓         |            |
| 15 | 112-69-6   | 1-Hexadecanamine, N,N-dimethyl-                                         | ✓         | ✓          | ✓         |            |
| 16 | 2917-26-2  | 1-Hexadecanethiol                                                       |           |            | ✓         |            |
| 17 | 104-76-7   | 1-Hexanol, 2-ethyl-                                                     | ✓         |            | ✓         |            |
| 18 | 3910-35-8  | 1H-Indene, 2,3-dihydro-1,1,3-trimethyl-3-phenyl-                        | ✓         |            | ✓         |            |
| 19 | 18435-45-5 | 1-Nonadecene                                                            | ✓         |            |           |            |
| 20 | 112-92-5   | 1-Octadecanol                                                           |           | ✓          |           |            |
| 21 | 112-88-9   | 1-Octadecene                                                            | ✓         |            |           | ✓          |
| 22 | 7785-70-8  | 1R-.alpha.-Pinene                                                       |           |            | ✓         |            |
| 23 | 25152-84-5 | 2,4-Decadienal, (E,E)-                                                  | ✓         |            |           |            |
| 24 | 719-22-2   | 2,5-Cyclohexadiene-1,4-dione, 2,6-bis(1,1-dimethylethyl)-               | ✓         |            | ✓         |            |
| 25 | 111-02-4   | 2,6,10,14,18,22-Tetracosahexaene, 2,6,10,15,19,23-hexamethyl-, (all-E)- | ✓         |            |           |            |
| 26 | 13150-81-7 | 2,6-Dimethyldecane                                                      | ✓         |            |           |            |
| 27 | 118-60-5   | 2-Ethylhexyl salicylate                                                 | ✓         |            | ✓         |            |
| 28 | 83834-59-7 | 2-Ethylhexyl trans-4-methoxycinnamate                                   |           | ✓          |           |            |
| 29 |            | 2-Furanecarboxylic acid, 3,5-dimethylcyclohexyl ester                   | ✓         |            |           |            |
| 30 | 20324-32-7 | 2-Propanol, 1-(2-methoxy-1-methylethoxy)-                               | ✓         |            |           |            |
| 31 | 13429-07-7 | 2-Propanol, 1-(2-methoxypropoxy)-                                       | ✓         |            |           |            |

| No | CAS No      | Compound                                                               | Zone A    |            | Zone B    |            |
|----|-------------|------------------------------------------------------------------------|-----------|------------|-----------|------------|
|    |             |                                                                        | System ON | System OFF | System ON | System OFF |
| 32 | 107-98-2    | 2-Propanol, 1-methoxy-                                                 |           |            | ✓         |            |
| 33 | 5466-77-3   | 2-Propenoic acid, 3-(4-methoxyphenyl)-, 2-ethylhexyl ester             |           | ✓          |           | ✓          |
| 34 | 26952-13-6  | 2-Tetradecene, (E)-                                                    | ✓         |            |           |            |
| 35 | 612-75-9    | 3,3'-Dimethylbiphenyl                                                  | ✓         |            |           |            |
| 36 | 14035-33-7  | 3,5-di-tert-Butyl-4-hydroxyacetophenone                                | ✓         |            |           |            |
| 37 | 1620-98-0   | 3,5-di-tert-Butyl-4-hydroxybenzaldehyde                                | ✓         |            |           |            |
| 38 | 498-60-2    | 3-Furaldehyde                                                          | ✓         |            |           |            |
| 39 | 726-18-1    | 4,4'-Diacetyldiphenylmethane                                           |           |            | ✓         |            |
| 40 | 6004-38-2   | 4,7-Methano-1H-indene, octahydro-                                      |           |            | ✓         |            |
| 41 | 4488-57-7   | 4,7-Methanoindene, 3a,4,5,6,7,7a-hexahydro-, endo-                     |           |            | ✓         |            |
| 42 |             | 4b,8-Dimethyl-2-isopropylphenanthrene, 4b,5,6,7,8,8a,9,10-octahydro-   | ✓         |            |           |            |
| 43 | 6333-79-5   | 4-Chlorobenzenesulfonamide, N-methyl-                                  | ✓         |            |           |            |
| 44 | 3796-70-1   | 5,9-Undecadien-2-one, 6,10-dimethyl-, (E)-                             | ✓         | ✓          |           |            |
| 45 | 88-29-9     | 7-Acetyl-6-ethyl-1,1,4,4-tetramethyltetralin                           |           | ✓          |           |            |
| 46 | 109680-01-5 | 7-Isopropyl-1,1,4a-trimethyl-1,2,3,4,4a,9,10,10a-octahydrophenanthrene | ✓         |            |           |            |
| 47 | 16269-05-9  | 8-Benzoyloctanoic acid                                                 | ✓         |            |           |            |
| 48 | 92618-89-8  | Acetic acid, 1,7,7-trimethyl-bicyclo[2.2.1]hept-2-yl ester             |           |            | ✓         |            |
| 49 | 123-86-4    | Acetic acid, butyl ester                                               |           |            | ✓         |            |
| 50 | 5348-82-3   | Acetic acid, chloro-, octadecyl ester                                  |           | ✓          |           |            |
| 51 | 140-11-4    | Acetic acid, phenylmethyl ester                                        | ✓         |            |           |            |
| 52 | 98-86-2     | Acetophenone                                                           | ✓         |            |           |            |
| 53 | 99-93-4     | Acetophenone, 4'-hydroxy-                                              | ✓         |            | ✓         |            |
| 54 | 100-52-7    | Benzaldehyde                                                           | ✓         |            |           |            |
| 55 | 15764-16-6  | Benzaldehyde, 2,4-dimethyl-                                            | ✓         |            |           |            |
| 56 | 100-83-4    | Benzaldehyde, 3-hydroxy-                                               | ✓         |            |           |            |
| 57 | 621-59-0    | Benzaldehyde, 3-hydroxy-4-methoxy-                                     |           |            | ✓         |            |
| 58 | 123-11-5    | Benzaldehyde, 4-methoxy-                                               | ✓         |            |           |            |
| 59 | 55-21-0     | Benzamide                                                              | ✓         |            | ✓         | ✓          |
| 60 | 71-43-2     | Benzene                                                                | ✓         |            |           |            |
| 61 | 54986-44-6  | Benzene, (1,3,3-trimethylnonyl)-                                       |           | ✓          |           |            |
| 62 | 4534-50-3   | Benzene, (1-butylonyl)-                                                | ✓         |            | ✓         |            |

| No | CAS No     | Compound                                                         | Zone A    |            | Zone B    |            |
|----|------------|------------------------------------------------------------------|-----------|------------|-----------|------------|
|    |            |                                                                  | System ON | System OFF | System ON | System OFF |
| 63 | 2400-00-2  | Benzene, (1-ethyldecyl)-                                         |           |            | ✓         |            |
| 64 | 4534-52-5  | Benzene, (1-ethylundecyl)-                                       | ✓         |            | ✓         | ✓          |
| 65 | 4534-53-6  | Benzene, (1-methyldodecyl)-                                      | ✓         | ✓          | ✓         | ✓          |
| 66 | 4534-59-2  | Benzene, (1-methyltridecyl)-                                     | ✓         |            | ✓         |            |
| 67 | 2719-61-1  | Benzene, (1-methylundecyl)-                                      | ✓         |            | ✓         |            |
| 68 | 4534-49-0  | Benzene, (1-pentyldecyl)-                                        | ✓         |            | ✓         |            |
| 69 | 4534-51-4  | Benzene, (1-propyldecyl)-                                        | ✓         | ✓          | ✓         |            |
| 70 | 700-60-7   | Benzene, (trichloroethenyl)-                                     | ✓         |            |           |            |
| 71 |            | Benzene, 1,1'-(3,3-dimethyl-1-butenylidene)bis-                  | ✓         |            |           |            |
| 72 | 526-73-8   | Benzene, 1,2,3-trimethyl-                                        | ✓         |            | ✓         |            |
| 73 | 95-63-     | Benzene, 1,2,4-trimethyl-                                        | ✓         |            |           |            |
| 74 | 108-67-8   | Benzene, 1,3,5-trimethyl-                                        | ✓         |            | ✓         |            |
| 75 | 108-38-3   | Benzene, 1,3-dimethyl-                                           | ✓         | ✓          | ✓         | ✓          |
| 76 | 7525-62-4  | Benzene, 1-ethenyl-3-ethyl-                                      | ✓         |            |           |            |
| 77 | 620-14-4   | Benzene, 1-ethyl-3-methyl-                                       |           |            | ✓         |            |
| 78 | 622-96-8   | Benzene, 1-ethyl-4-methyl-                                       |           |            | ✓         |            |
| 79 | 527-84-4   | Benzene, 1-methyl-2-(1-methylethyl)-                             | ✓         |            |           |            |
| 80 | 103-65-1   | Benzene, propyl-                                                 |           |            | ✓         |            |
| 81 | 65-85-0    | Benzenecarboxylic acid                                           | ✓         |            | ✓         |            |
| 82 | 3622-84-2  | Benzenesulfonamide, N-butyl-                                     | ✓         | ✓          | ✓         |            |
| 83 | 100-47-0   | Benzonitrile                                                     | ✓         |            | ✓         |            |
| 84 | 119-61-9   | Benzophenone                                                     | ✓         |            |           |            |
| 85 | 95-16-9    | Benzothiazole                                                    | ✓         |            | ✓         |            |
| 86 | 100-51-6   | Benzyl Alcohol                                                   | ✓         | ✓          | ✓         | ✓          |
| 87 |            | Bicyclo[10.8.0]eicosane, cis-                                    |           |            |           | ✓          |
| 88 | 5655-61-8  | Bicyclo[2.2.1]heptan-2-ol, 1,7,7-trimethyl-, acetate, (1S-endo)- |           |            | ✓         |            |
| 89 | 76-49-3    | Bornyl acetate                                                   |           |            | ✓         |            |
| 90 | 766-90-5   | cis-.beta.-Methylstyrene                                         | ✓         |            |           |            |
| 91 | 14398-71-1 | cis-Decalin, 2-syn-methyl-                                       | ✓         |            | ✓         |            |
| 92 | 294-62-2   | Cyclododecane                                                    |           | ✓          | ✓         |            |
| 93 | 296-56-0   | Cycloeicosane                                                    |           |            | ✓         | ✓          |
| 94 | 295-65-8   | Cyclohexadecane                                                  |           |            | ✓         |            |
| 95 | 4292-92-6  | Cyclohexane, pentyl-                                             | ✓         |            |           |            |

| No  | CAS No      | Compound                                                                                     | Zone A    |            | Zone B    |            |
|-----|-------------|----------------------------------------------------------------------------------------------|-----------|------------|-----------|------------|
|     |             |                                                                                              | System ON | System OFF | System ON | System OFF |
| 96  | 2216-51-5   | Cyclohexanol, 5-methyl-2-(1-methylethyl)-, [1R-(1.alpha.,2.beta.,5.alpha.)]-                 | ✓         |            |           |            |
| 97  | 301643-32-3 | Cyclohexene, 4-(4-ethylcyclohexyl)-1-pentyl-                                                 | ✓         |            |           |            |
| 98  | 1222-05-5   | Cyclopenta[g]-2-benzopyran, 1,3,4,6,7,8-hexahydro-4,6,6,7,8,8-hexamethyl-                    |           | ✓          | ✓         |            |
| 99  | 295-48-7    | Cyclopentadecane                                                                             | ✓         |            |           |            |
| 100 |             | Cyclopentanecarboxamide, 3-ethenyl-2-(3-pentenylidene)-N-phenyl-, [1.alpha.,2Z(E),3.alpha.]- |           |            | ✓         |            |
| 101 |             | Cyclopropane carboxamide, 2-cyclopropyl-2-methyl-N-(1-cyclopropylethyl)-                     | ✓         |            |           |            |
| 102 | 295-17-0    | Cyclotetradecane                                                                             | ✓         | ✓          | ✓         | ✓          |
| 103 |             | D,D-Dihomoandrostane, (5.alpha.)-                                                            | ✓         |            |           |            |
| 104 | 112-31-2    | Decanal                                                                                      | ✓         | ✓          | ✓         | ✓          |
| 105 | 124-18-5    | Decane                                                                                       | ✓         | ✓          |           | ✓          |
| 106 | 17312-53-7  | Decane, 3,6-dimethyl-                                                                        |           |            | ✓         |            |
| 107 | 17312-62-8  | Decane, 5-propyl-                                                                            | ✓         |            |           |            |
| 108 | 84-66-2     | Diethyl Phthalate                                                                            | ✓         |            | ✓         |            |
| 109 | 112-40-3    | Dodecane                                                                                     | ✓         | ✓          | ✓         | ✓          |
| 110 | 112-52-7    | Dodecane, 1-chloro-                                                                          |           |            | ✓         | ✓          |
| 111 | 3891-98-3   | Dodecane, 2,6,10-trimethyl-                                                                  | ✓         |            | ✓         |            |
| 112 | 31295-56-4  | Dodecane, 2,6,11-trimethyl-                                                                  |           |            | ✓         |            |
| 113 | 1560-97-0   | Dodecane, 2-methyl-                                                                          |           | ✓          |           |            |
| 114 | 55045-08-4  | Dodecane, 2-methyl-6-propyl-                                                                 |           |            | ✓         |            |
| 115 | 17312-57-1  | Dodecane, 3-methyl-                                                                          | ✓         | ✓          |           |            |
| 116 | 143-07-7    | Dodecanoic acid                                                                              |           | ✓          |           | ✓          |
| 117 | 112-95-8    | Eicosane                                                                                     | ✓         | ✓          | ✓         | ✓          |
| 118 | 54446-78-5  | Ethanol, 1-(2-butoxyethoxy)-                                                                 | ✓         |            |           |            |
| 119 | 112-34-5    | Ethanol, 2-(2-butoxyethoxy)-                                                                 | ✓         | ✓          | ✓         | ✓          |
| 120 | 111-76-2    | Ethanol, 2-butoxy-                                                                           | ✓         | ✓          | ✓         |            |
| 121 | 122-99-6    | Ethanol, 2-phenoxy-                                                                          | ✓         |            | ✓         |            |
| 122 | 1009-61-6   | Ethanone, 1,1'-(1,4-phenylene)bis-                                                           | ✓         |            |           |            |
| 123 | 100-41-4    | Ethylbenzene                                                                                 | ✓         |            | ✓         |            |
| 124 |             | Exo-tricyclo[5.2.1.0(2.6)]decane                                                             |           |            | ✓         |            |
| 125 | 98-01-1     | Furfural                                                                                     | ✓         |            |           |            |

| No  | CAS No     | Compound                                                                    | Zone A    |            | Zone B    |            |
|-----|------------|-----------------------------------------------------------------------------|-----------|------------|-----------|------------|
|     |            |                                                                             | System ON | System OFF | System ON | System OFF |
| 126 |            | Galaxolide 1                                                                |           | ✓          |           |            |
| 127 | 629-94-7   | Heneicosane                                                                 | ✓         | ✓          | ✓         |            |
| 128 | 629-78-7   | Heptadecane                                                                 | ✓         | ✓          | ✓         |            |
| 129 | 54833-48-6 | Heptadecane, 2,6,10,15-tetramethyl-                                         |           |            | ✓         |            |
| 130 | 20959-33-5 | Heptadecane, 7-methyl-                                                      | ✓         |            |           |            |
| 131 | 13287-23-5 | Heptadecane, 8-methyl-                                                      | ✓         |            |           |            |
| 132 | 7225-64-1  | Heptadecane, 9-octyl-                                                       | ✓         |            |           |            |
| 133 | 506-12-7   | Heptadecanoic acid                                                          |           |            |           | ✓          |
| 134 | 5617-41-4  | Heptylcyclohexane                                                           |           | ✓          |           | ✓          |
| 135 | 629-80-1   | Hexadecanal                                                                 | ✓         |            |           |            |
| 136 | 544-76-3   | Hexadecane                                                                  | ✓         | ✓          | ✓         | ✓          |
| 137 | 638-36-8   | Hexadecane, 2,6,10,14-tetramethyl-                                          | ✓         | ✓          |           | ✓          |
| 138 | 55000-52-7 | Hexadecane, 2,6,10-trimethyl-                                               | ✓         |            |           |            |
| 139 | 1560-92-5  | Hexadecane, 2-methyl-                                                       | ✓         |            |           |            |
| 140 | 112-39-0   | Hexadecanoic acid, methyl ester                                             | ✓         |            |           |            |
| 141 | 2416-20-8  | Hexadecenoic acid, Z-11-                                                    | ✓         |            |           |            |
| 142 | 105-99-7   | Hexanedioic acid, dibutyl ester                                             |           | ✓          | ✓         |            |
| 143 | 149-57-5   | Hexanoic acid, 2-ethyl-                                                     | ✓         |            |           |            |
| 144 |            | Indolo[2,3-a]quinolizin-4(12H)-one, 1,2,3,6,7,12b-hexahydro-3,12b-dimethyl- |           |            | ✓         |            |
| 145 | 142-91-6   | Isopropyl Palmitate                                                         | ✓         |            |           |            |
| 146 | 462-95-3   | Methane, diethoxy-                                                          |           |            | ✓         |            |
| 147 | 124-10-7   | Methyl tetradecanoate                                                       | ✓         |            |           |            |
| 148 | 4175-54-6  | Naphthalene, 1,2,3,4-tetrahydro-1,4-dimethyl-                               | ✓         |            |           |            |
| 149 | 2958-76-1  | Naphthalene, decahydro-2-methyl-                                            |           |            | ✓         |            |
| 150 | 334-48-5   | n-Decanoic acid                                                             | ✓         |            |           |            |
| 151 | 57-10-3    | n-Hexadecanoic acid                                                         | ✓         | ✓          | ✓         | ✓          |
| 152 | 629-92-5   | Nonadecane                                                                  | ✓         |            |           |            |
| 153 | 75163-99-4 | Nonadecane, 2,3-dimethyl-                                                   | ✓         |            |           |            |
| 154 | 6418-45-7  | Nonadecane, 3-methyl-                                                       | ✓         |            |           |            |
| 155 | 13287-24-6 | Nonadecane, 9-methyl-                                                       | ✓         |            |           |            |
| 156 | 124-19-6   | Nonanal                                                                     | ✓         | ✓          | ✓         | ✓          |
| 157 | 112-05-0   | Nonanoic acid                                                               | ✓         | ✓          | ✓         |            |
| 158 | 638-66-4   | Octadecanal                                                                 |           |            | ✓         |            |

| No  | CAS No     | Compound                                                        | Zone A    |            | Zone B    |            |
|-----|------------|-----------------------------------------------------------------|-----------|------------|-----------|------------|
|     |            |                                                                 | System ON | System OFF | System ON | System OFF |
| 159 | 593-45-3   | Octadecane                                                      | ✓         | ✓          | ✓         | ✓          |
| 160 | 930-02-9   | Octadecane, 1-(ethenyloxy)-                                     | ✓         |            | ✓         |            |
| 161 | 75163-97-2 | Octadecane, 2,6-dimethyl-                                       | ✓         |            | ✓         |            |
| 162 | 57-11-4    | Octadecanoic acid                                               |           |            | ✓         |            |
| 163 | 124-13-0   | Octanal                                                         |           |            | ✓         |            |
| 164 | 2216-34-4  | Octane, 4-methyl-                                               | ✓         |            |           |            |
| 165 | 124-07-2   | Octanoic Acid                                                   |           | ✓          |           |            |
| 166 |            | Oxalic acid, dodecyl isobutyl ester                             |           |            | ✓         |            |
| 167 |            | Oxirane, heptadecyl-                                            | ✓         | ✓          | ✓         |            |
| 168 | 629-92-5   | Oxirane, hexadecyl-                                             |           | ✓          |           |            |
| 169 | 7320-37-8  | Oxirane, tetradecyl-                                            |           |            | ✓         | ✓          |
| 170 | 18633-25-5 | Oxirane, tridecyl-                                              |           |            | ✓         |            |
| 171 | 95-47-6    | o-Xylene                                                        | ✓         | ✓          | ✓         |            |
| 172 | 629-62-9   | Pentadecane                                                     | ✓         |            | ✓         | ✓          |
| 173 | 3892-00-0  | Pentadecane, 2,6,10-trimethyl-                                  | ✓         |            |           |            |
| 174 | 2801-87-8  | Pentadecane, 4-methyl-                                          | ✓         |            |           |            |
| 175 | 6165-40-8  | Pentadecane, 7-methyl-                                          | ✓         |            | ✓         |            |
| 176 | 1002-84-2  | Pentadecanoic acid                                              |           |            | ✓         | ✓          |
| 177 | 1572-52-7  | Pentanedinitrile, 2-methylene-                                  | ✓         |            |           |            |
| 178 | 108-95-2   | Phenol                                                          | ✓         |            | ✓         |            |
| 179 |            | Phenol, 2-(1,1-dimethylethyl)-4-(1-methyl-1-phenylethyl)-       |           |            | ✓         |            |
| 180 | 96-76-4    | Phenol, 2,4-bis(1,1-dimethylethyl)-                             |           |            | ✓         |            |
| 181 | 837-08-1   | Phenol, 2,4'-isopropylidenedi-                                  | ✓         | ✓          | ✓         |            |
| 182 | 5875-45-6  | Phenol, 2,5-bis(1,1-dimethylethyl)-                             |           |            | ✓         |            |
| 183 | 80-05-7    | Phenol, 4,4'-(1-methylethylidene)bis-                           | ✓         | ✓          | ✓         | ✓          |
| 184 | 98-54-4    | Phenol, p-tert-butyl-                                           |           | ✓          |           |            |
| 185 | 85-44-9    | Phthalic anhydride                                              | ✓         |            |           |            |
| 186 |            | Piperidine, 1-(5-trifluoromethyl-2-pyridyl)-4-(1H-pyrrol-1-yl)- |           |            | ✓         |            |
| 187 | 4286-23-1  | p-Isopropenylphenol                                             | ✓         |            | ✓         |            |
| 188 | 79-09-4    | Propanoic acid                                                  | ✓         |            |           |            |
| 189 | 2078-54-8  | Propofol                                                        | ✓         |            |           |            |
| 190 | 106-42-3   | p-Xylene                                                        | ✓         | ✓          | ✓         | ✓          |
| 191 | 100-42-5   | Styrene                                                         | ✓         |            |           |            |

|       |             |                                                | Zone A |        | Zone B |        |
|-------|-------------|------------------------------------------------|--------|--------|--------|--------|
|       |             |                                                | System | System | System | System |
| No    | CAS No      | Compound                                       | ON     | OFF    | ON     | OFF    |
| 192   | 124-25-4    | Tetradecanal                                   | ✓      | ✓      | ✓      | ✓      |
| 193   | 629-59-4    | Tetradecane                                    | ✓      | ✓      | ✓      | ✓      |
| 194   | 544-63-8    | Tetradecanoic acid                             | ✓      |        | ✓      |        |
| 195   | 852228-22-9 | Tetrapentacontane, 1,54-dibromo-               | ✓      |        |        |        |
| 196   | 108-88-3    | Toluene                                        | ✓      |        | ✓      |        |
| 197   |             | trans, cis-3-Ethylbicyclo[4.4.0]decane         | ✓      |        |        |        |
| 198   |             | trans-Decalin, 2-methyl-                       | ✓      |        |        |        |
| 199   | 103495-51-8 | Tricyclo[3.1.0.0(2,4)]hex-3-ene-3-carbonitrile | ✓      |        |        |        |
| 200   | 629-50-5    | Tridecane                                      | ✓      | ✓      | ✓      |        |
| 201   | 1560-96-9   | Tridecane, 2-methyl-                           | ✓      |        |        |        |
| 202   | 55045-11-9  | Tridecane, 5-propyl-                           | ✓      |        |        |        |
| 203   | 121-44-8    | Triethylamine                                  | ✓      |        | ✓      |        |
| 204   | 1120-21-4   | Undecane                                       | ✓      | ✓      | ✓      | ✓      |
| 205   | 17301-23-4  | Undecane, 2,6-dimethyl-                        |        | ✓      |        | ✓      |
| 206   | 17312-82-2  | Undecane, 4,6-dimethyl-                        |        |        |        | ✓      |
| 207   | 112-37-8    | Undecanoic acid                                | ✓      |        |        |        |
| 208   | 121-33-5    | Vanillin                                       | ✓      |        |        |        |
| 209   | 19814-75-6  | Xanthene, 9,9-dimethyl-                        |        |        | ✓      |        |
| 210   |             | Z-11(13,13-Dimethyl)tetradecen-1-ol acetate    | ✓      |        |        |        |
| 211   | 76402-60-3  | Z-5-Nonadecene                                 |        | ✓      |        | ✓      |
| 212   | 2416-19-5   | Z-7-Hexadecenoic acid                          |        |        |        | ✓      |
| TOTAL |             |                                                | 146    | 52     | 105    | 37     |
